1 **Maternal effects influence temperature-dependent offspring survival in**  
2 ***Drosophila melanogaster***

3 Snigdha Mohan<sup>1</sup>, Ton G.G. Groothuis<sup>1</sup>, Chris Vinke<sup>1</sup>, and Jean-Christophe Billeter<sup>1</sup> \*

4 <sup>1</sup> Groningen Institute for Evolutionary Life Sciences, PO Box 11103, University of  
5 Groningen, Groningen, 9700 CC, The Netherlands.

6 \*To whom correspondence should be addressed.

7 Dr. Jean-Christophe Billeter

8 Groningen Institute for Evolutionary Life Science

9 University of Groningen

10 Groningen 9700CC

11 The Netherlands

12 Phone: +31 50 363 7851

13 E-Mail: [j.c.billeter@rug.nl](mailto:j.c.billeter@rug.nl)

14

15

16 **Keywords** Maternal effects, phenotypic plasticity, Match-mismatch hypothesis,  
17 *Drosophila melanogaster*, temperature, transgenerational plasticity.

18

19 **Abstract**

20 Mothers may modulate the phenotype of their offspring by affecting their development  
21 based on her own environment. In changing environments, these maternal effects are  
22 thought to adjust offspring physiology and development and thus produce offspring  
23 better prepared to the environment experienced by the mother. However, evidence for  
24 this is scarce. Here we test the consequences of a match or mismatch between mother  
25 and offspring temperature conditions on growth, adult morphology and reproduction  
26 into the grandchildren generation in the fruit fly *Drosophila melanogaster*. This  
27 experimental design tests the relative contribution of maternal effects and offspring  
28 intrinsic plasticity to the phenotypic response to temperature conditions. We  
29 manipulated maternal temperature conditions by exposing mothers to either 18°C or  
30 29°C conditions. Their eggs developed at a temperature that was either matched or  
31 mismatched with the maternal one. Survival from egg to adult was higher when the  
32 maternal and offspring environments matched, showing maternal effects affecting a  
33 trait that is a close proxy for fitness. However developmental speed, adult size and  
34 fecundity responded to temperature mostly through offspring phenotypic plasticity and  
35 maternal effects only had a small contribution. The results provide experimental  
36 evidence for maternal effects in influencing a potentially adaptive offspring response  
37 to temperature in the model organism *Drosophila melanogaster*. These effects appear  
38 to modulate early embryonic phenotypes such as survival, more than the adult  
39 phenotypes of the offspring.

40 **Introduction**

41

42 Changes in biotic and abiotic conditions are a normal feature of most environments.  
43 Organisms can adjust to these changes through genetic variants, or, in the time frame  
44 of one lifetime, through developmental, physiological and behavioral phenotypic  
45 plasticity. This plasticity allows the emergence of different phenotypes and life history  
46 strategies adapted to specific environmental variables (Nylin, 2013). Phenotypic  
47 plasticity often arises through mechanisms modulating developmental events. As these  
48 mechanisms occur during early development, embryos might not yet be equipped to  
49 sense environmental cues predicting its later environment. A route for controlling  
50 phenotypic plasticity is via the parents, who experience cues of environmental change  
51 and may adjust offspring development by influencing their prenatal environment. This  
52 can be achieved by influencing egg composition or the transfer of nutrients, immune  
53 factors or hormonal signals during pregnancy that can induce epigenetic changes  
54 regulating developmental plasticity and resulting in phenotypic differences in the  
55 offspring (Groothuis *et al.*, 2005).

56 An outstanding question is to what extent phenotypic plasticity is based on cues  
57 experienced by the individual versus cues experienced by their parents (Uller *et al.*,  
58 2013; Groothuis & Taborsky, 2015). If plasticity in a particular phenotype is adaptive  
59 and can be traced back to parental effects, induced by the parental environment, then  
60 this indicates that the parents have made adjustments relevant to the postnatal  
61 environment of their offspring. In this case the parental prediction of the offspring  
62 environment is then accurate, the offspring's phenotype will “match” the environment  
63 in which it will live, potentially increasing its fitness. However, if the prediction is  
64 wrong, there is a ‘mismatch’ at the potential cost of the survival and/or fecundity of the  
65 offspring. However, environmental conditions can also directly affect the parents  
66 ability to provision their eggs, or look after their offspring. Such effects can carry over  
67 to their offspring but do not represent anticipatory plasticity as the parental experience,  
68 such as food and resource limitation, simply carry over to the next generation and  
69 constrain their development (Uller *et al.*, 2013; Nettle & Bateson, 2015; Raveh *et al.*,  
70 2016; Engqvist & Reinhold, 2016). There are few clear examples of anticipatory  
71 parental effect. For instance, in daphnia, parents exposed to predators produce offspring  
72 that are morphologically better equipped against predation (Agrawal *et al.*, 1999). The

73 broad adaptive relevance of such anticipatory parental effects however remains  
74 controversial, in part because of the methodological difficulties in finding the right  
75 environmental cues and the requirement of testing phenotypes of offspring in full  
76 factorial design including exposing and testing offspring in environments that are either  
77 matched or mismatched with that of their parents (Uller *et al.*, 2013).

78 We developed a paradigm to test the anticipatory nature of parental effects in laboratory  
79 conditions, allowing measuring the separate contribution of parental effect and direct  
80 environmental effects on offspring phenotypic plasticity. We chose to study the effect  
81 of ambient temperature because it is an environmental variable that fulfills three criteria  
82 for testing anticipatory parental effects: it is not constant, its changes are related to  
83 seasons and thus predictable for the mother, and it is sufficiently persistent to be of  
84 relevance for developmental phenotypic adjustment. Moreover, temperature induces  
85 transgenerational effects in several species, including fish (Salinas & Munch, 2012;  
86 Munday, 2014). We chose to study the fruit fly *Drosophila melanogaster* because its  
87 development is strongly temperature dependent, its cosmopolitan distribution exposes  
88 it to a large range of temperatures and substantial fluctuations in temperature over the  
89 reproductive season depending on its geographical location (Hoffmann, 2010). The fast  
90 generation time of this species (7 days at 29°C; (Ashburner, 1989) means that  
91 environmental variables experienced by parents may match those of the postnatal  
92 environment of their offspring, making anticipatory maternal effects a potentially  
93 relevant mechanism.

94 *Drosophila* has behavioural and morphological phenotypic plasticity in response to  
95 temperature (James *et al.*, 1997; Gilchrist & Huey, 2001; Petavy *et al.*, 2001; Trotta *et al.*,  
96 2006). For example, flies developing at 18°C will develop slower but reach larger  
97 adult size than genetically identical flies developing at 29°C. However, flies housed in  
98 hotter conditions are typically more fecund than those in colder conditions (Kingsolver  
99 & Huey, 2008). Previous studies have described parental effects in *Drosophila* linked  
100 to temperature on a variety of traits including developmental speed (Huey *et al.*, 1995;  
101 Gilchrist & Huey, 2001), cold tolerance (Watson & Hoffmann, 1995), egg size (Crill *et al.*,  
102 1996) and survival (Magiafoglou & Hoffmann, 2003), but the one study that tested  
103 parental effects in a match-mismatch design did not find evidence that a match between  
104 parent and offspring environment resulted in greater offspring fitness. However,

105 developmental survival, an important proxy for fitness, was not measured in those  
106 studies.

107

108 Here we tested the relative contribution of parental effected and offspring phenotypic  
109 plasticity in *Drosophila* up to the second generation using a full factorial match-  
110 mismatch design. We exposed mothers to one of two temperature conditions (18°C and  
111 29°C) and let their offspring develop under either matched or mismatched temperatures  
112 (Figure 1). We examined the effect of match-mismatch conditions on offspring  
113 morphological traits (such as egg size\volume and wing size), and life history traits  
114 (such as survival, fecundity and developmental time), to estimate the size of parental  
115 effects and offspring intrinsic phenotypic plasticity of these traits in different stages of  
116 development.

## 117 **Material and Methods**

### 118 ***Drosophila* stocks and rearing conditions**

119 The *Oregon-R* laboratory wild-type strain was used in all experiments. Stocks were  
120 kept in vials at 25°C in a 12:12 Light-Dark (LD) cycle and reared on fly food (referred  
121 henceforth as “food”) medium containing agar (10g/L), glucose (167mM), sucrose  
122 (44mM), yeast (35g/L), cornmeal (15g/L), wheat germ (10g/L), soya flour (10 g/L),  
123 molasses (30 g/L), propionic acid and Tegosept. For Temperature treatment, flies were  
124 reared in two walk-in climate chambers, one set at 18°C (average recorded temperature  
125 17.7°C, with min at 17.3 and max at 18.3) and one set at 29°C (average recorded  
126 temperature 28.7°C, with min of 28.3°C and max of 29.8°C).

127

### 128 **Experimental design: Match-Mismatch temperature treatment**

#### 129 *Generation of F<sub>1</sub>*

130 The experimental treatments schedule is outlined in fig. 1. Approximately 200 F<sub>0</sub> flies  
131 were placed in an egg-laying cage with a removable egg-laying dish. The egg laying  
132 dish consisted of a 35x10mm petri dish layered with 3 ml of a solution composed of  
133 20g agar, 26g sucrose, 52g glucose, and 9% (v/v) red grape juice per litre of distilled  
134 water spotted with a fresh dab of dry yeast mixed with water. The cage was kept at  
135 25°C in a 12:12LD incubator. Eggs were collected twice a day at Circadian Time (CT)  
136 0 and CT8 by replacing the egg-laying dish. Larvae were picked 24hr later from dishes

137 stored at 25°C. Groups of 40 larvae were transferred to a single 25x95mm plastic vial  
138 containing 6ml of food (referred to as food vial) and left to develop to adulthood at  
139 25°C in a 12:12LD incubator. Virgin F<sub>1</sub> females were collected from these vials at room  
140 temperature (~22°C) using mild CO<sub>2</sub> anesthesia (exposure for maximum couple of  
141 minutes under minimal CO<sub>2</sub> flow).

142

#### 143 *Treatment of F<sub>1</sub>*

144 F<sub>1</sub> virgin females were individually transferred immediately after collection to a  
145 35x10mm Petri dish layered with 3 ml of food. The dishes were moved within an hour  
146 of collection to either an 18°C or to a 29°C walk-in climate chamber with a 12:12LD  
147 cycle. After 24 hours, two virgin males, offspring of the same F<sub>0</sub> flies, that had been  
148 raised and aged at 25°C in a 12:12LD incubator, were added to each dish to fertilize the  
149 females. Twenty-four hours later, single females were transferred to individual dishes  
150 with fresh fly food and a dab of yeast paste to stimulate egg laying. Females were then  
151 allowed to lay eggs for 24hrs in either 18°C or 29°C conditions.

152

#### 153 *Treatment of F<sub>2</sub>*

154 Eggs laid by F<sub>1</sub> females at 18°C or 29°C were collected directly from the egg-laying  
155 dish on this third treatment day and transferred to a vial containing 6.5 ml of food for  
156 development. The brood was split by transferring half the eggs to the 18°C treatment  
157 and the other half to the 29°C treatment (fig. 1). F<sub>2</sub> adults were collected at eclosion.  
158 Mating assays were performed at the same temperature at which the offspring  
159 developed and were set up by introducing one virgin female with one virgin male into  
160 a Petri dish layered with food. F<sub>2</sub> siblings treated in either matched or mismatched  
161 conditions were mated with each other. After a single mating, females were transferred  
162 to food vials housed at the same temperature at which they developed to lay eggs.  
163 Females were transferred three times to a fresh vial at two days intervals to prevent  
164 overcrowding of the food vials by larvae. The number of F<sub>3</sub> adults was counted at  
165 eclosion.

166

#### 167 **Offspring traits**

##### 168 *Number of eggs*

169 The number of eggs laid at 18°C and 29°C during a 24hr egg-laying period was counted

170 directly in the egg-laying dish.

171 ***Egg volume measurement***

172 One to five freshly laid eggs were collected hourly from single females at both 18°C  
173 and 29°C (from 11 and 31 females respectively). The size of matched eggs was  
174 measured immediately at collection. To rule out a potential direct effect of temperature  
175 on egg size shortly after laying, mismatched eggs were measured 5 hrs after collection,  
176 to allow time for temperature to potentially impact egg volume, and compared to  
177 matched eggs. Eggs were photographed using a Leica MZ10F stereomicroscope  
178 equipped with a Leica DFC450c camera connected to a computer running the Leica  
179 Application Suit software. Egg Length (L) and width (W) were determined using the  
180 software ImageJ (National Institutes of Health, Bethesda, MD, USA) on photographs  
181 taken at 6.3X magnification. The volume (V) was determined by using formula  
182  $V=(1/6)\pi W^2L$  (Markow *et al.*, 2009).

183 ***Survival from egg to adult***

184 Eggs were collected as described above from single females at 18°C or 29°C, except  
185 that the egg collection was limited to a single 4-hour interval. Slow egg laying by  
186 females at 18°C resulted in an average of 7.5 ( $\pm$  4.7) eggs collected per female (n= 81),  
187 while faster egg laying at 29°C resulted in 37.6 ( $\pm$  20.4) per female (n=81). Because of  
188 the small number of eggs in this specific experimental setup, broods from single  
189 females were not split, but instead randomly assigned to 18°C or 29°C conditions after  
190 transfer to a food vial. Number of adults produced from these eggs was counted at  
191 eclosion to determine the percent survival from egg to adult.

192

193 ***Developmental Time***

194 To determine the developmental time from egg to adult, the time and date of laying of  
195 eggs and that of adult eclosion were recorded. Groups of 15-40 eggs per female were  
196 collected at 8-16 hours interval and transferred to a food vial. This time interval was  
197 required to collect sufficient amount of eggs at 18°C, where egg-laying rate is slower  
198 than at 29°C (Huey *et al.*, 1995). Development time was determined from the time eggs  
199 were collected to the time the last adult from that group of eggs emerged.

200 To determine developmental time at 29°C more precisely, as development is faster  
201 under this condition than at 18°C, single eggs were collected at one hour intervals and

202 exposed to matched or mismatched treatments. At the pupal stage, a Logitech webcam  
203 controlled by the SecurityMonitor Pro software took pictures at 1-hour intervals to  
204 determine the precise eclosion time. Red light was utilized to visualize pupae during the  
205 dark phase. These data were used to confirm developmental time differences in 29°C  
206 Match and 18°C -29°C mismatched conditions.

### 207 ***Wing size measurement***

208 There is an association between size, fecundity and mating success in *Drosophila*;  
209 larger individuals have more offspring and have a greater chance of mating (Kingsolver  
210 & Huey, 2008). We estimated the size of matched and mismatched adult offspring as  
211 an indirect measurement of fitness. We measured wing size parameters since those are  
212 correlated with total body size and can be more accurately measured. The right wing of  
213 5 F<sub>2</sub> adults from the same mother were measured to constitute one replicate. Wings  
214 were removed with fine forceps 5-6 hours post-eclosion and mounted on a glass slide  
215 with a cover slip. Pictures of wings were taken as for egg volume. Measurement method  
216 was adapted from (Joubert & Bijlsma, 2010). Wing length and width were measured  
217 with the program ImageJ (v. 6.4).

### 218 ***Reproductive performance***

219 The fitness of F<sub>1</sub> mothers was estimated based on the number of grand-children they  
220 obtained when their offspring had been kept in conditions that matched or mismatched  
221 theirs. Three pairs of matched and three pairs of mismatched F<sub>2</sub> males and females per  
222 F<sub>1</sub> mother were allowed to mate a single time after which single F<sub>2</sub> mated females were  
223 transferred to a fresh food vial and allowed to lay eggs for their entire lifespan. The  
224 resulting F<sub>3</sub> adults were counted to determine the F<sub>2</sub> reproductive performance. F<sub>2</sub> and  
225 F<sub>3</sub> individuals were continuously kept in the same conditions in which the original F<sub>2</sub>  
226 eggs were treated, leading to an unbroken chain of matched or mismatched conditions  
227 with respect to the F<sub>1</sub> maternal condition. F<sub>2</sub> flies were kept at the same temperature  
228 condition in which they developed in food vials in groups of 10 individuals of the same  
229 sex for 5 days before mating.

230 As we did not measure lifetime reproductive output of F<sub>1</sub> mothers, we used the number  
231 of F<sub>2</sub> adults generated by 1 day of F<sub>1</sub> mothers egg laying to estimate their reproductive  
232 output when their offspring are in matched vs. mismatched conditions (fig. 2c). The



233 number of F<sub>3</sub> produced by F<sub>2</sub> was determined as described in the paragraph above. The  
234 average number of offspring for a single F<sub>1</sub> mother was multiplied by the average  
235 number of offspring of single F<sub>2</sub> mothers to determine reproductive performance in  
236 different temperatures and in matched or mismatched conditions.

### 237 **Statistics**

238 The unit of replication is the F<sub>1</sub> mother. All graphs display the mean measure of  
239 offspring phenotypes per mother.

240 For statistical analysis, effects of treatments on the variables egg volume, progeny  
241 number (after Log-transformation), wing length and wing width were determined using  
242 a standard least square mixed effect model in which variables were continuous and  
243 normally distributed. Mother, offspring temperature conditions (18°C or 29°C) and  
244 offspring sex, as well as their interactions were modelled as fixed effects, and individual  
245 F<sub>1</sub> mothers as random effects.

246 For survival (fig. 2c), a binomial logistic regression, with Mother and offspring  
247 temperature conditions as fixed effects and individual mothers as a random effect, was  
248 applied on the proportion of eggs that survived to adulthood.

249 Developmental time (fig. 2d) and grand offspring number (fig. 4) data showed unequal  
250 variance as determined by Bartlett test of homogeneity of variance. An Analysis of  
251 variance was performed on these data allowing for unequal variance using the  
252 Generalized Least Square function from the nlme package in R (R Studio Team  
253 2016,v1.0.143). We used the varIdent variance function, which fits a separate residual  
254 variance for each of the four categories of the data. For testing significance of fixed  
255 effects, models were re-fitted with max likelihood and fixed effects were tested with  
256 Likelihood Ratio Test (LRT).

257

258 The variables offspring survival and developmental times were continuous and  
259 normally distributed. Differences between experimental conditions on these variables  
260 were determined using a standard least square model with mother and offspring  
261 temperature conditions (18°C or 29°C) modeled as fixed effects.

262 Unless indicated otherwise, Mixed Standard Least Squares models were run with JMP  
263 v. 9.0 for Mac, T-test and Mann-Whitney U-test were performed using GraphPad Prism  
264 (GraphPad software, Inc.). Effect sizes between two treatments were computed using

265 Cohen's d formula: **Cohen's d** = 
$$\frac{\text{Mean Group}_1 - \text{Mean Group}_2}{\sqrt{\frac{(n_1-1)\text{stdev}_1^2 + (n_2-1)\text{stdev}_2^2}{(n_1+n_2)-1}}}$$

## 266 **Results**

### 267 **Females lay fewer but larger eggs at 18°C than at 29°C**

268 To determine the influence of temperature on reproduction of the F<sub>1</sub> females we first  
269 analysed the number of eggs laid at 18°C and 29°C. As previously reported (Huey *et*  
270 *al.*, 1995), females laid significantly fewer eggs at 18°C than 29°C (Mann-Whitney test;  
271 U=127.5; p<0.0001)(fig. 2a). Eggs measured within 1 hour after laying had a larger  
272 volume when produced by mothers housed at 18°C than at 29°C (fig. 2b). To control  
273 for a direct early effect of temperature on egg volume independent of maternal effects,  
274 we placed eggs of both maternal temperatures in mismatched conditions for 5 hours  
275 (time between egg-laying and hatching is about 24 hours) directly after egg laying and  
276 compared their volume with that of matched eggs (fig. 2b). Maternal temperature  
277 condition had a significant effect on egg volume (fig. 2b; table 1), which was larger at  
278 18°C than 29°C (fig. 2b). Statistical analysis yielded no effect of egg temperature  
279 condition indicating that eggs do not show intrinsic phenotypic plasticity in volume  
280 during the first 5 hours of development and that, as expected, egg size is solely under  
281 maternal control (fig. 2b; table 1).

282

### 283 **Matched offspring have greater survival than mismatched ones**

284 In matched conditions, survival is higher at 18°C than 29°C (Mann-Whitney test;  
285 U=537.5, P=0.0077) (fig. 2c), consistent with the documented deleterious effects of  
286 temperatures above 28°C (Petavy *et al.*, 2001). Mothers laying at 29°C might thus be  
287 making the best of a bad situation. More interestingly, there was a statistically  
288 significant interaction between maternal and offspring conditions on offspring survival  
289 indicating the presence of maternal effects in response to temperature (fig. 2c; table 1).  
290 These maternal effects suggest anticipatory matching because a mismatch between  
291 mother and offspring environments resulted in reduced offspring survival compared to  
292 matched conditions at both 18°C and 29°C (fig. 2c).

293 **Offspring and maternal condition interact in determining developmental time**

294 Eggs developing at 29°C developed faster than those developing at 18°C, irrespectively  
295 of mothers condition, showing a strong direct effect of temperature on offspring  
296 development (fig. 2*d*; table 1; table S1). In addition, statistical analysis indicates a  
297 highly significant interaction between mother and offspring temperature conditions  
298 indicating maternal effects on offspring developmental speed, in addition to the direct  
299 effects of temperature on offspring development (fig. 2*d*; table 1). The developmental  
300 speed of offspring from mothers housed at 29°C, but who developed at mismatched  
301 18°C, eclosed three days earlier than matched offspring from mothers housed at 18°C,  
302 whereas this was not the case for the 29°C developmental condition (fig. 2*d*).

303

304 The measurement of maternal effects on offspring developing at 29°C are less accurate  
305 that those at 18°C because of the greater speed of development. To verify maternal  
306 effects on the development time of eggs housed at 29°C, and to estimate these effects  
307 with greater accuracy, we collected eggs hourly and monitored development using 1hr  
308 time-lapse imaging. Mismatched offspring eclosed as adults 9 hours later than matched  
309 ones, confirming the presence of maternal effects at 29°C (fig. 2*e*).

310

311 Offspring temperature has the largest effect size on developmental speed, showing that  
312 intrinsic phenotypic plasticity is more important than maternal effects for this trait (fig.  
313 2*d*; table 1; table S1). The maternal effect, however, did influence developmental speed,  
314 which is always faster in offspring from mothers housed at 29°C than offspring from  
315 mothers housed at 18°C, irrespectively of the temperature condition of the offspring  
316 themselves (fig. 2*d*).

317

318 **Wing length but not width is influenced by maternal effects**

319 Both wing length and size are significantly larger in individuals that developed at 18°C  
320 compared to those at 29°C (fig. 3; table 1), and females had significantly longer wings  
321 than males (fig. 3; table 1). There is therefore a strong influence of offspring  
322 temperature condition and sex on size. However the wing length of both females (fig.  
323 3*a*) and males (fig. 3*b*) was also significantly influenced by maternal temperature  
324 conditions (table 1). The observation that female offspring from mothers housed at  
325 29°C always had shorter wings than female offspring from mothers housed at 18°C  
326 indicates that maternal effects on female wing length might be carry-over effects from

327 the temperature in which the mothers were housed. However maternal effects have a  
328 different effect on male offspring than female offspring as indicated by the statistical  
329 3-way interaction between maternal and offspring conditions and sex on wing lengths  
330 as well as the post hoc test per sex indicating that in males, but not females, the mother  
331 and offspring condition interact to determine wing length (table 1). Male offspring from  
332 mothers housed at 18°C have larger wings than male offspring from mothers housed at  
333 29°C, but only when the offspring was exposed to 29°C. Indeed, wing length does not  
334 significantly differ between matched F<sub>2</sub> males from mothers housed at 18°C or  
335 mismatched F<sub>2</sub> males that grew at 18°C but that are from mothers housed at 29°C (t-  
336 test with Welch's correction:  $t=1.303$ ,  $df=79$ ,  $P=0.196$ ). The carry over effect from  
337 mothers housed at 29°C observed in females thus appears to be partly compensated in  
338 male offspring at 18°C.

339

340 There is no statistical effect of mother condition on wing width, neither by itself or in  
341 interaction with offspring condition (fig. 2c-d; table 1), but a strong effect of offspring  
342 condition alone indicating that individual differences due to temperature conditions are  
343 the result of intrinsic offspring phenotypic plasticity.

#### 344 **Reproductive performance of F<sub>2</sub> offspring is unaffected by F<sub>1</sub> maternal condition**

345 We determined the fecundity of matched and mismatched F<sub>2</sub> offspring in the context of  
346 assortative sibling mating (fig. 4). Statistical analysis indicated a significant effect of  
347 F<sub>2</sub> rearing condition but no effect of F<sub>1</sub> mother condition (table 1). Within temperature  
348 conditions, matched and mismatched F<sub>2</sub> offspring did not differ significantly in  
349 offspring number indicating a lack of F<sub>1</sub> maternal effect extending to the F<sub>2</sub> generation  
350 (fig. 4). Intriguingly, both matched and mismatched F<sub>2</sub> offspring produced slightly  
351 more F<sub>3</sub> offspring at 29°C than at 18°C (fig. 4), suggestive of decreased fecundity at  
352 18°C as a result of intrinsic phenotypic plasticity.

353

#### 354 **Discussion**

355

356 The goal of the present study was to test, in a laboratory setting, the extent to which  
357 anticipatory maternal effects in *Drosophila melanogaster* may modulate phenotypic  
358 values in their offspring traits in response to temperature - an environmental variable  
359 known to have relevance for fitness (Kingsolver & Huey, 2008). We used a full

360 experimental match-mismatch design allowing us to separate maternal effects from  
361 intrinsic offspring plasticity and maternal adjustment from carry over effects. Evidence  
362 for matching, also known as anticipatory maternal effect, would come from mothers  
363 modifying offspring traits such that offspring reared and living in the same environment  
364 as that of their parents will have higher fitness than offspring living in an environment  
365 different from that of their parents (Mousseau and Dingle 1991; Leroi et al. 1994; Huey  
366 et al. 1999). We found that survival from egg to adult is subjected to anticipatory  
367 maternal matching in that offspring raised in the same temperature as their parents had  
368 a higher survival than those raised at different temperatures, irrespective of the actual  
369 temperature. Evidence for anticipatory effects was however not found for other  
370 phenotypes such as adult body size or fecundity. This latter is in keeping with previous  
371 work in *Drosophila*, which studied the consequences of parental effects in response to  
372 temperature on several phenotypic traits (Crill *et al.*, 1996) and on fitness (Gilchrist &  
373 Huey, 2001) and found evidence against adaptive matching but in favour for a higher  
374 fitness of flies whose parents were in hot conditions. These studies, however, measured  
375 fitness in terms of per capita rate of population increase but did not measure survival  
376 from egg to adult as we did.

377

378 The relative larger egg volume of mothers housed at 18°C compared to mothers housed  
379 at 29°C indicates that females provision eggs more at 18°C than at 29°C (fig. 2b). The  
380 effect size of temperature on egg volume and number are similar but in opposite  
381 directions suggesting the trade-off between egg volume and number found in other egg  
382 laying species (Williams, 2001)(table S1). This differential provisioning may provide  
383 maternal input to the offspring affecting developmental plasticity. Egg volume  
384 increases in response to selection for fast development in *Drosophila* (Bakker 1969)  
385 and a larger volume has a positive effects on embryonic viability and development rate,  
386 hatchling weight, larval feeding rate, and larval and pre-adult development rates  
387 (Azevedo *et al.*, 2010). This association between larger egg volume and higher survival  
388 is observed in our experiments where the smaller eggs produced by mothers at 29°C  
389 have lower survival to adulthood than those produced by mother housed at 18°C (fig.  
390 2c). The low egg to adult survival at 29°C in our study is in keeping with previous  
391 reports of lower viability in conditions above 28°C (Petavy *et al.*, 2001). Another  
392 possible explanation for the differential survival at the different temperatures are  
393 differences in egg density due to lower egg-laying at 18°C than at 29°C; too many

394 larvae can affect viability through food limitation (Horváth & Kalinka, 2016). The  
395 mean number of eggs per vial was lower (~8) at 18°C than at 29°C (~20), but  
396 corresponded to egg density that are far from leading to food limitation (starting at 175  
397 eggs/vial) (Horváth & Kalinka, 2016). The match-mismatch design indicates the  
398 presence of anticipatory maternal effects because within one temperature condition,  
399 offspring raised in conditions that match that of their parents are more likely to survive  
400 development than those that are mismatched. This parental effect on survival is  
401 substantial and larger than the direct effect size of temperature on offspring survival,  
402 indicating the relevance of parental effect in offspring adaptation to temperature (table  
403 S1). As survival is a close proxy for fitness, it suggests that anticipatory parental effects  
404 can participate to evolutionary adaptation.

405

406 Maternal condition had a significant effect on developmental speed indicative of carry-  
407 over effects because both matched and mismatched offspring from mothers housed at  
408 18°C developed slower than both matched and mismatched offspring from mothers  
409 housed at 29°C (fig. 2d-e). Mothers housed at 18°C thus slow down offspring  
410 development and mothers housed at 29°C speed it up. Our combined data on  
411 developmental speed and survival (fig. 2c-e) may however suggest anticipatory  
412 maternal effects on offspring development. Intrinsic offspring phenotypic plasticity has  
413 a larger effect on developmental speed than maternal effects (fig. 2d; table S1), but  
414 anticipatory maternal effects have a large effect on survival compared to intrinsic  
415 phenotypic plasticity (fig. 2c; table S1). Reduced survival when the offspring  
416 environment is mismatched with that of the mother (fig. 2c) might therefore stem from  
417 maternal effects interfering to slow down development in, for instance, the anticipated  
418 colder conditions, increasing viability, while the hotter temperature in which the  
419 offspring is actually developing directly increases offspring development speed (and  
420 vice versa for mismatched offspring from mothers housed at hotter temperatures)(fig.  
421 2d-e). Incompatibility between these two processes might be the cause of the decreased  
422 survival when maternal and offspring environments are mismatched. Anticipatory  
423 maternal matching might be a normal feature of *Drosophila* development and the basis  
424 for the greater survival of offspring developing in conditions matched with those of  
425 their parents (fig. 2c). This might be an adaptation to the ecological conditions in which  
426 *Drosophila melanogaster* lives, which involves feeding and developing on fermenting  
427 food substrates where a fast development is crucial to outcompete microbes and fungi

428 (whose growth is also influenced by temperature)(Markow & O'Grady, 2008). Mothers  
429 may be able to prime their eggs for a faster or slower rate of development, through a  
430 mechanism that affects egg volume, that can be predicted from temperature conditions  
431 at the time of egg production, which would trigger a cascade of adaptation to higher  
432 temperatures in the larvae such as changes in feeding and developmental rate (Azevedo  
433 *et al.*, 2010).

434

435 Adaptive matching has a large effect on early viability, but do these effects persist well  
436 into the adult stage? One of the largest effects of temperature on adult size is that flies  
437 are bigger when the developmental conditions are cooler (Kingsolver & Huey, 2008).  
438 This is confirmed in our experiments showing that the major effect on adult wing size  
439 comes from offspring temperature conditions (fig. 4; table 1; Table S1). Maternal  
440 condition also had an effect on offspring adult wing size, albeit smaller (fig. 4; table  
441 S1). Given the high mortality observed at 29°C (fig. 2c), the observation of smaller  
442 wings at this temperature could have been the result of temperature selecting for flies  
443 with smaller wings, instead of a result of phenotypic plasticity. This is however unlikely  
444 to be the case because we used a wild-type strains that is largely inbred, thus reducing  
445 the difficulty in separating parental effects from selection on offspring genotype during  
446 the experiments (Faurby *et al.*, 2005). Maternal effects can be expected to influence  
447 adult offspring phenotype because final adult size is regulated by the size at which the  
448 larva stops growing and initiates metamorphosis. As the decision to metamorphose is  
449 made earlier in the final instar larva (Mirth & Shingleton, 2012), maternal effect on egg  
450 composition could still be acting on growth. However, this effect is not anticipatory  
451 matching but rather a carry-over effect because female offspring from mothers housed  
452 at 18°C always have longer wings than offspring from mothers housed at 29°C (fig. 4a-  
453 b). The carry over effect appears buffered in male offspring, since males that developed  
454 at 18°C had similar wing lengths whether they originated from a mother housed at 18°C  
455 or 29°C (fig. 4a-b). Males buffering carry-over maternal effects on wing length might  
456 give them an advantage because male-male competition and female mate choice is  
457 influenced by male wing and body size (Roff, 1986). However, males from mothers  
458 housed at 29°C and developing at 29°C have smaller wing size than those from mothers  
459 housed at 18°C. Wing area and length contribute to adaptation to temperature  
460 conditions because larger wings improve flight performance at colder conditions  
461 (Frazier *et al.*, 2008). Males with larger body size (and wing) have higher mate

462 competitive advantage (Kingsolver & Huey, 2008), which may select for mothers  
463 influencing their sons to have the greatest possible wing size for the perceived  
464 temperature. A male developing at 29°C, might have still be primed by his mother to  
465 develop greater wing size.

466 Given the observation of anticipatory maternal effects on temperature conditions, one  
467 outstanding question remains their potential fitness significance. By measuring the  
468 number of F<sub>2</sub> and F<sub>3</sub> offspring produced in different temperature conditions and under  
469 match or mismatched condition, we can determine the relative fitness consequences of  
470 maternal effects in matched and mismatched conditions. In matched conditions, the  
471 29°C temperature leads to 3 times more F<sub>2</sub> offspring than 18°C, leading to the clear  
472 conclusion that hotter temperature is conducive to higher fitness (fig. 5). In mismatched  
473 conditions, mothers housed at 29°C also have more offspring than mothers housed at  
474 18°C confirming previous observations that parents under hotter temperatures will have  
475 more offspring irrespective of offspring conditions (Gilchrist & Huey, 2001; Marshall  
476 & Sinclair, 2010)(fig. 5). However, within offspring condition, comparison of F<sub>2</sub>  
477 production of matched vs mismatched offspring always shows an advantage for  
478 matched offspring resulting in 1.2 times increases in progeny (fig. 5). This indicates  
479 that matching the temperature conditions of parents and offspring has fitness benefits  
480 for the parents, supporting the adaptive matching hypothesis. But does adaptive  
481 matching have an effect on the offspring fitness (F<sub>2</sub>)? This can be derived from  
482 comparing the number of offspring (F<sub>3</sub>) from F<sub>2</sub> parents raised in matched 18°C vs  
483 mismatched 29°C conditions, since the only difference between these two treatments  
484 is the condition of the F<sub>1</sub> mother. In this case, matched F<sub>2</sub> parents have slightly more  
485 offspring than mismatched F<sub>2</sub> parents (1.2 times more; fig. 4), indicating potential  
486 transgenerational fitness benefits of matching. However this effect is not statistically  
487 significant (as already determined in fig. 4; table 1). Comparing the number of offspring  
488 (F<sub>3</sub>) from F<sub>2</sub> parents raised in matched 29°C vs mismatched 18°C conditions shows that  
489 matched 29°C F<sub>2</sub> parents had fewer offspring (0.6x) than mismatched one (fig. 5),  
490 arguing against the adaptive matching hypothesis. However the effect of F<sub>1</sub> mother is  
491 again not statistically significant, indicating of a lack of negative maternal influence.  
492 We therefore conclude that this is an indication that there are little to no fitness  
493 consequences of adaptive matching on the offspring, just on the parents. The short  
494 generation time of *Drosophila* and the natural fluctuation in temperature conditions



495 might make maternal effects efficient for short term adaptation to developmental  
496 conditions of the offspring but not for its reproductive ability as an adult. Committing  
497 those effects to the next generation might be futile given that the conditions are likely  
498 to have changed again. A test of the adaptive value of these anticipatory effect will be  
499 to demonstrate that the population used has been subject to natural selection in a  
500 variable, but predictable, environment. As we used an inbred fly strains that has been  
501 kept in the lab for a long time, we cannot reach this conclusion.

502

503 In summary, our results suggest the existence of anticipatory maternal effects in  
504 response to temperature in *Drosophila melanogaster*. These maternal effects affect  
505 mostly parental fitness, by increasing offspring survival without increasing offspring  
506 fecundity. Adaptive matching parental effects to temperature are thus not  
507 multigenerational. We could only find anticipatory matching in the context of survival  
508 but suspect that maternal effects on developmental speed, that may appear as carry over  
509 effects, might be connected to an early maternal effect that sets embryos in a  
510 developmental trajectory that is adapted to the temperature conditions experienced by  
511 the mother. A better mechanistic understanding of maternal effects is therefore required  
512 to distinguish between anticipatory and carry-over effects. Given the breadth of  
513 mechanistic knowledge on the effects of the maternal genome on early *Drosophila*  
514 development and the tools available to study *Drosophila* development (Schüpbach &  
515 Wieschaus, 1986), a mechanistic understanding of anticipatory maternal effects should  
516 now be on the horizon. It will be equally relevant to demonstrate the adaptive  
517 significance of these effects observed under laboratory conditions by showing, in an  
518 outbred population, that anticipatory maternal effects can be selected in environments  
519 that are variable, but predictable.

520

## 521 **Acknowledgement**

522 We thank Pinar Güler, Martine Maan, Bernd Riedstra for critical comments on the  
523 manuscript, and Ido Pen for help with statistics. This work was supported in parts by  
524 an Erasmus Mundus Svagata short-term post-doctoral fellowship to Snigdha Mohan, as  
525 well as funds from the University of Groningen and the Dutch organization for  
526 scientific research (NWO) to J.C. Billeter.

527 **Competing interests**

528 The authors declare no competing interests.

529

530 **Author contributions**

531 A.G.G. and J.-C.B designed and interpreted the study. S.M. and C.V. performed all  
532 experiments. A.G.G. and J.-C.B performed the statistical analysis. J.-C.B. prepared the  
533 figures and manuscript.

534 **Funding**

535 This study was conducted with the support of funds from the University of Groningen  
536 to J.C.-B and an Erasmus Mundus Svagata post-doctoral fellowship to S.M.

537

538 **References:**

539 Agrawal, A.A., Laforsch, C. & Tollrian, R. 1999. Transgenerational induction of  
540 defences in animals and plants. *Nature* **401**: 60–63.

541 Azevedo, R.B.R., Partridge, L. & French, V. 2010. Life-History Consequences of Egg  
542 Size in *Drosophila Melanogaster*. *The American Naturalist* **150**: 250–282. The  
543 University of Chicago Press.

544 Crill, W.D., Huey, R.B. & Gilchrist, G.W. 1996. Within-and between-generation  
545 effects of temperature on the morphology and physiology of *Drosophila*  
546 *melanogaster*. *Evolution* **50**: 1205–1218.

547 Engqvist, L. & Reinhold, K. 2016. Adaptive trans-generational phenotypic plasticity  
548 and the lack of an experimental control in reciprocal match/mismatch  
549 experiments. *Methods Ecol Evol* **7**: 1482–1488.

550 Faurby, S., Kjærsgaard, A., Pertoldi, C. & Loeschcke, V. 2005. The effect of maternal  
551 and grandmaternal age in benign and high temperature environments. *Exp.*  
552 *Gerontol.* **40**: 988–996.

553 Frazier, M.R., Harrison, J.F., Kirkton, S.D. & Roberts, S.P. 2008. Cold rearing  
554 improves cold-flight performance in *Drosophila* via changes in wing morphology.  
555 *J. Exp. Biol.* **211**: 2116–2122. The Company of Biologists Ltd.

556 Gilchrist, G.W. & Huey, R.B. 2001. Parental and developmental temperature effects  
557 on the thermal dependence of fitness in *Drosophila melanogaster*. *Evolution* **55**:  
558 209–214.

- 559 Groothuis, T.G.G. & Taborsky, B. 2015. Introducing biological realism into the study  
560 of developmental plasticity in behaviour. *Frontiers in Zoology* **12**: S6. BioMed  
561 Central Ltd.
- 562 Groothuis, T.G.G., Müller, W., Engelhardt, von, N., Carere, C. & Eising, C. 2005.  
563 Maternal hormones as a tool to adjust offspring phenotype in avian species.  
564 *Neurosci Biobehav Rev* **29**: 329–352.
- 565 Horváth, B. & Kalinka, A.T. 2016. Effects of larval crowding on quantitative  
566 variation for development time and viability in *Drosophila melanogaster*. *Ecol*  
567 *Evol* **6**: 8460–8473.
- 568 Huey, R.B., Wakefield, T., Crill, W.D. & Gilchrist, G.W. 1995. Within-and between-  
569 generation effects of temperature on early fecundity of *Drosophila melanogaster*.  
570 *Heredity* **74**: 216–223.
- 571 James, A.C., Azevedo, R.B. & Partridge, L. 1997. Genetic and environmental  
572 responses to temperature of *Drosophila melanogaster* from a latitudinal cline.  
573 *Genetics* **146**: 881–890. Genetics Society of America.
- 574 Joubert, D. & Bijlsma, R. 2010. Interplay between habitat fragmentation and climate  
575 change: inbreeding affects the response to thermal stress in *Drosophila*  
576 *melanogaster*. *Clim. Res.* **43**: 57–70.
- 577 Kingsolver, J.G. & Huey, R.B. 2008. Size, temperature, and fitness: three rules.  
578 *Evolutionary Ecology Research* **10**: 251–268. Evolutionary Ecology, Ltd.
- 579 Magiafoglou, A. & Hoffmann, A. 2003. Thermal adaptation in *Drosophila serrata*  
580 under conditions linked to its southern border: unexpected patterns from  
581 laboratory selection suggest limited evolutionary potential. *J Genet* **82**: 179–189.
- 582 Markow, T.A. & O’Grady, P. 2008. Reproductive ecology of *Drosophila*. *Functional*  
583 *Ecology* **22**: 747–759.
- 584 Marshall, K.E. & Sinclair, B.J. 2010. Repeated stress exposure results in a survival–  
585 reproduction trade-off in *Drosophila melanogaster*. *Proc Biol Sci* **277**: 963–969.  
586 The Royal Society.
- 587 Munday, P.L. 2014. Transgenerational acclimation of fishes to climate change and  
588 ocean acidification. *F1000Prime Rep* **6**: 99.
- 589 Nettle, D. & Bateson, M. 2015. Adaptive developmental plasticity: what is it, how can  
590 we recognize it and when can it evolve? *Proceedings of the Royal Society B:*  
591 *Biological Sciences* **282**: 20151005. The Royal Society.
- 592 Petavy, G., David, J.R., Gibert, P. & Moreteau, B. 2001. Viability and rate of  
593 development at different temperatures in *Drosophila*: a comparison of constant  
594 and alternating thermal regimes. *Journal of Thermal Biology* **26**: 29–39.
- 595 Raveh, S., Vogt, D. & Kölliker, M. 2016. Maternal programming of offspring in  
596 relation to food availability in an insect (*Forficula auricularia*). *Proceedings of the*  
597 *Royal Society B: Biological Sciences* **283**: 20152936. The Royal Society.

Article

Maternal effects related to temperature

- 598 Salinas, S. & Munch, S.B. 2012. Thermal legacies: transgenerational effects of  
599 temperature on growth in a vertebrate. *Ecol Lett* **15**: 159–163. Blackwell  
600 Publishing Ltd.
- 601 Trotta, V., Calboli, F.C.F., Ziosi, M., Guerra, D., Pezzoli, M.C., David, J.R., *et al.*  
602 2006. Thermal plasticity in *Drosophila melanogaster*: a comparison of geographic  
603 populations. *BMC Evol Biol* **6**: 67.
- 604 Uller, T., Nakagawa, S. & English, S. 2013. Weak evidence for anticipatory parental  
605 effects in plants and animals. *J Evol Biol* **26**: 2161–2170.
- 606 Watson, M. & Hoffmann, A.A. 1995. Cross-Generation Effects for Cold Resistance in  
607 Tropical Populations of *Drosophila-Melanogaster* and *Drosophila-Simulans*. *Aust*  
608 *J Zool* **43**: 51–58.
- 609

610

611 **Table 1:** Test of between-subject fixed effects of maternal and offspring temperature  
612 conditions

| Phenotype                                | Factors<br>M=Mother condition<br>O=Offspring condition | D.F.     | Test<br>statistic | P                 |
|------------------------------------------|--------------------------------------------------------|----------|-------------------|-------------------|
| Egg volume<br>(fig 1B)                   | <b>M</b>                                               | 1,48.11  | F=33.56           | <b>&lt;0.0001</b> |
|                                          | <b>O</b>                                               | 1,48.11  | F=1.90            | 0.1738            |
|                                          | <b>M x O interaction</b>                               | 1,48.11  | F=0.34            | 0.5604            |
| Survivability<br>(fig 1C)                | <b>M</b>                                               | 1,3689   | Z=-3.825          | <b>0.01145</b>    |
|                                          | <b>O</b>                                               | 1,3689   | Z=-2.028          | <b>0.04259</b>    |
|                                          | <b>M x O interaction</b>                               | 1, 689   | Z=2.839           | <b>0.00452</b>    |
| Developmental<br>time<br>(fig 1D)        | <b>M x O interaction</b>                               | 1,132    | LRT=51.404        | <b>&lt;0.0001</b> |
|                                          |                                                        |          |                   |                   |
| Wing length<br>(fig 2A&B)                | <b>M</b>                                               | 1,65.11  | F=23.40           | <b>&lt;0.0001</b> |
|                                          | <b>O</b>                                               | 1,58.36  | F=505.45          | <b>&lt;0.0001</b> |
|                                          | <b>O sex</b>                                           | 1,386.88 | F=281.43          | <b>&lt;0.0001</b> |
|                                          | <b>M x O x O sex interaction</b>                       | 1,391.09 | F=6.80            | <b>0.0094</b>     |
|                                          | <b>M x O interaction</b>                               | 1,65.11  | F=5.62            | <b>0.0206</b>     |
| Wing Length<br>female<br>(fig 2A)        | <b>M</b>                                               | 1,61.17  | F=17.72           | <b>&lt;0.0001</b> |
|                                          | <b>O</b>                                               | 1,61.17  | F=292.23          | <b>&lt;0.0001</b> |
|                                          | <b>M x O interaction</b>                               | 1,61.17  | F=0.61            | 0.4359            |
| Wing Length<br>male<br>(fig 2B)          | <b>M</b>                                               | 1,62.67  | F=17.72           | <b>&lt;0.0001</b> |
|                                          | <b>O</b>                                               | 1,62.67  | F=292.23          | <b>&lt;0.0001</b> |
|                                          | <b>M x O interaction</b>                               | 1,62.67  | F=12.21           | <b>0.0009</b>     |
| Wing width<br>Female<br>(fig 2C)         | <b>M</b>                                               | 1,55.91  | F=0.16            | 0,6828            |
|                                          | <b>O</b>                                               | 1,55.91  | F=81.68           | <b>&lt;0.0001</b> |
|                                          | <b>M x O interaction</b>                               | 1,55.91  | F=1.85            | 0.1784            |
| Wing width<br>male<br>(fig 2D)           | <b>M</b>                                               | 1,62.28  | F=0.02            | 0,8706            |
|                                          | <b>O</b>                                               | 1,62.28  | F=169.74          | <b>&lt;0.0001</b> |
|                                          | <b>M x O interaction</b>                               | 1,62.28  | F=0.41            | 0.5212            |
| Grand-<br>offspring<br>number<br>(Fig 3) | <b>M</b>                                               | 1,93     | LRT=3.81          | 0.0507            |
|                                          | <b>O</b>                                               | 1,93     | LRT=14.82         | <b>0.0018</b>     |
|                                          | <b>M x O interaction</b>                               | 1,93     | LRT=0.17          | 0.6795            |

613

614

615 **Figure 1: Match-Mismatch design to investigate anticipatory parental effects in**  
616 **response to temperature conditions.** Newly emerged F<sub>1</sub> adult females who developed  
617 at 25°C were acclimated to 18°C or 29°C for 24 hours. Females were then housed for  
618 24 hours with two males for fertilization. Males were discarded and the females were  
619 allowed to lay eggs for 24 hours. Eggs were collected and split in four groups: Matched  
620 18°C group, where mothers experienced 18°C condition and offspring developed at  
621 18°C; Mismatched 29°C-18°C group, where mothers experienced 29°C and offspring  
622 developed at 18°C; Matched 29°C group, where mothers experienced 29°C and  
623 offspring developed at 29°C; Mismatched 18°C -29°C group, where mothers  
624 experienced 18°C and offspring developed at 29°C. Eggs were transferred to a food  
625 vial where they developed until adulthood. Arrows from F<sub>2</sub> eggs to adults indicates the  
626 developmental time in matched conditions. Pairs of F<sub>2</sub> adult males and females were  
627 mated at the same temperature they developed. Their F<sub>3</sub> offspring were also raised at  
628 those same temperatures.

629

630

631 **Figure 2: Influence of maternal temperature on egg phenotypes.** (A) Average  
632 number of eggs laid in 24 hours by single females housed at 18°C or 29°C. Number of  
633 replicates is 41 females for each condition. (B) Effect of maternal and offspring  
634 conditions on egg volume. Mothers and eggs were housed at 18°C or 29°C as indicated.  
635 Arrows indicate direction of the change due to the mismatch of parents and offspring  
636 environments. The number of F<sub>1</sub> mothers tested in each condition ranged from 11-31.  
637 Error bars indicate Standard Error of the Mean (S.E.M). (C) Effect of maternal and  
638 offspring conditions on offspring survival. The number of broods tested in each  
639 condition was 41. (D) Effect of maternal and offspring conditions on offspring  
640 developmental time. The number of clutches tested in each condition was 34. (E)  
641 Developmental time at 29°C of offspring from mothers housed at 18°C or 29°C. Each  
642 dot represents one egg. Mann-Whitney U-test indicates a significant effect of maternal  
643 condition on offspring developmental time (P=0.0089).

644

645

646 **Figure 3: Influence of maternal and offspring temperatures on wing size.** Mothers  
647 and eggs were housed in 18°C or 29°C environments as indicated. Arrows indicate  
648 direction of the change due to the mismatch of parents and offspring environments h.

649 Error bars indicate Standard Error of the Mean (S.E.M). The number of replicate  
650 mothers was 16 in all 4 mother-offspring temperature combinations in Panels (A-D).

651

652 **Figure 4: Reproductive performance of F<sub>2</sub> offspring.** Single Matched and  
653 mismatched F<sub>2</sub> females were mated singly with their brother and led in the conditions  
654 in which they developed. Females laid their eggs and the eggs developed in the same  
655 conditions. The number of adult offspring was counted at emergence. Error bars  
656 indicate Standard Error of the Mean (S.E.M). The number of replicate F<sub>1</sub> mothers  
657 ranged from 19 to 32.

658

659 **Figure 5: Fitness consequences of maternal effects.** The temperature condition of the  
660 mother is indicated by the border colour (Blue for 18°C and red for 29°C). The colour  
661 of the boxes themselves indicates the condition in which the offspring developed and  
662 reproduced (Blue for 18°C and red for 29°C). A difference in colour between borders  
663 and shading indicates a mismatch condition. Numbers in the boxes in the first two  
664 columns indicate the number of offspring produced by a single F<sub>1</sub> or F<sub>2</sub> mother. Below  
665 the graph are relative differences in offspring production between the different  
666 treatments discussed in the text. The grey box highlights treatments whose comparison  
667 reveal maternal effects.

Figure 1

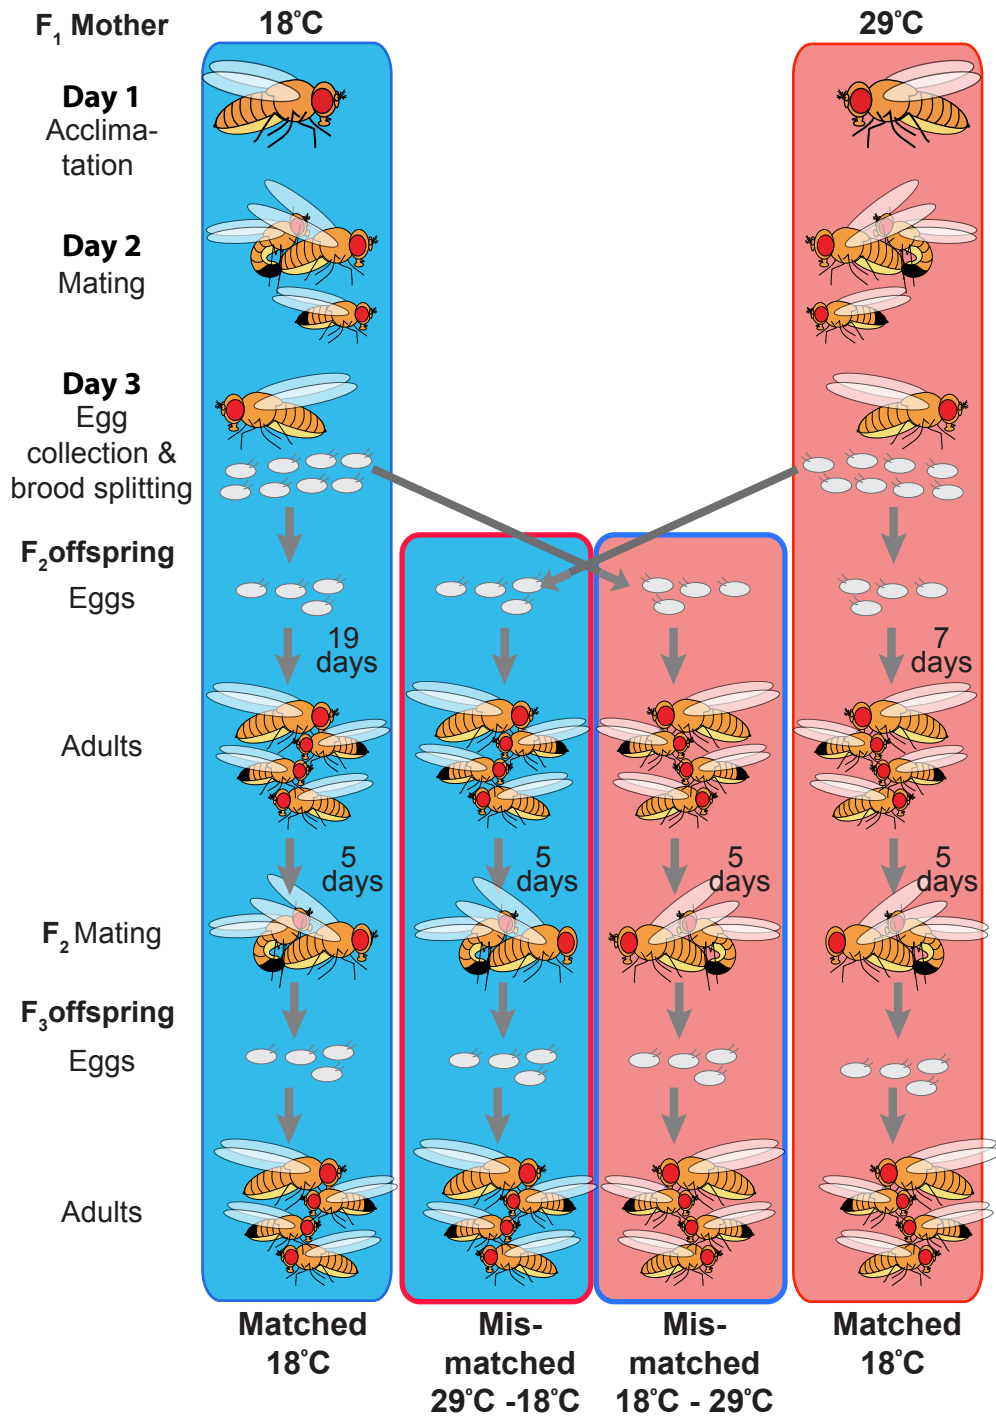



**Figure 2**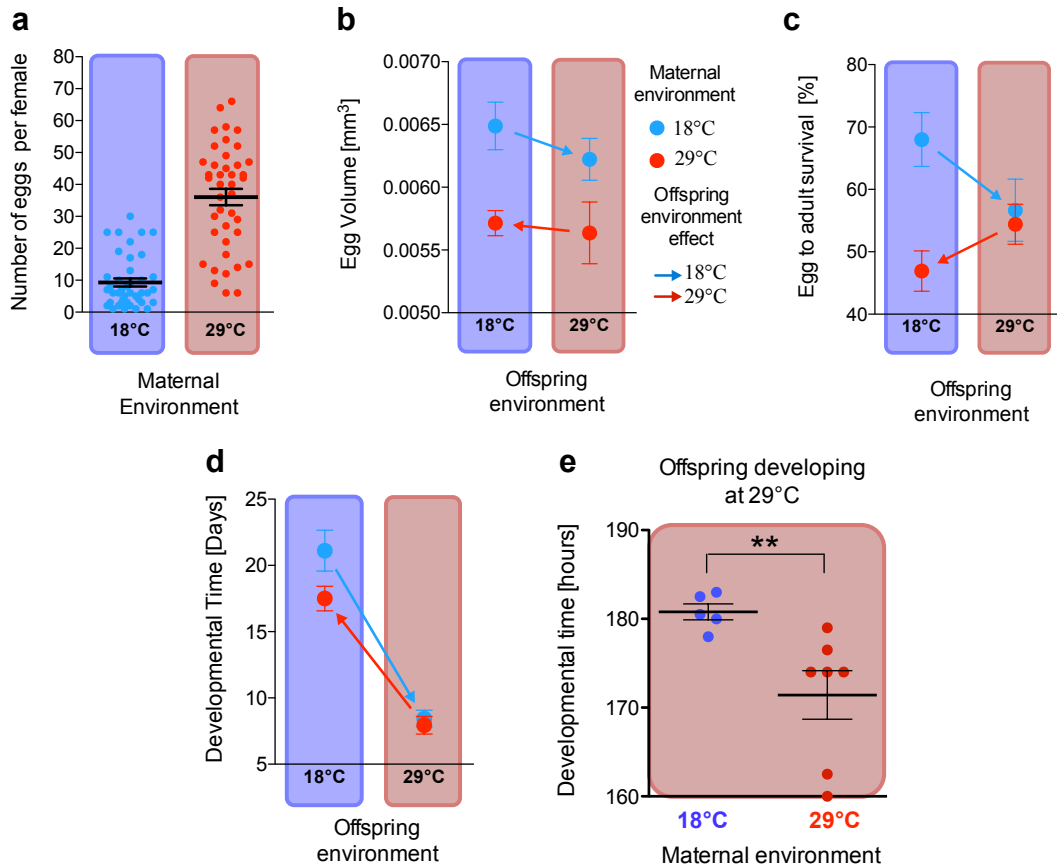

Figure 3

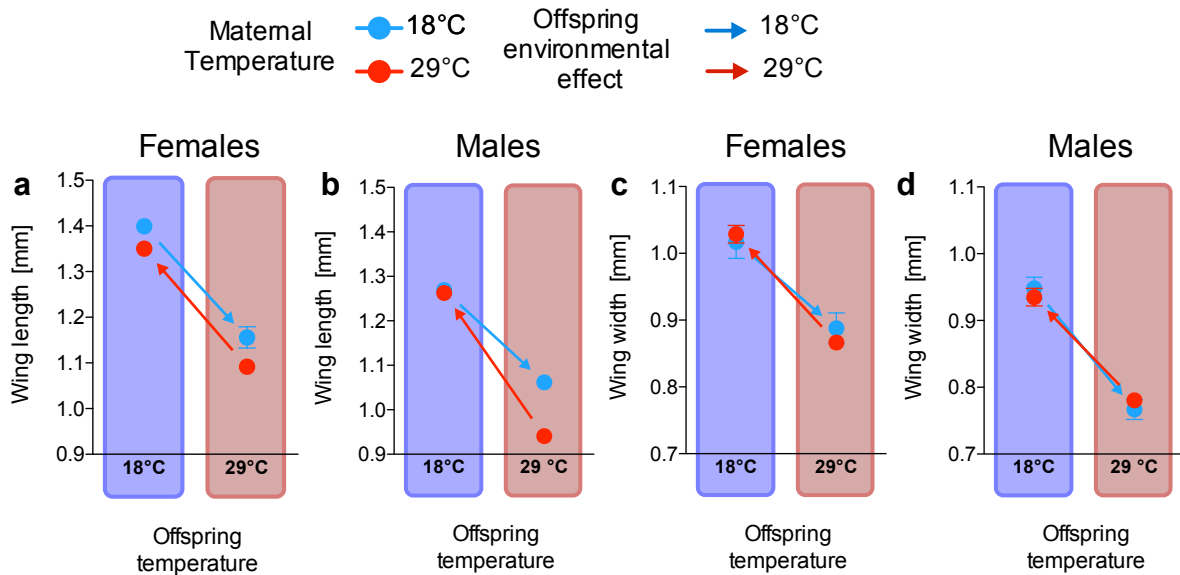

Figure 4

Grand-Maternal Temperature ● 18°C ● 29°C

F<sub>2</sub> & F<sub>3</sub> environmental effect → 18°C → 29°C

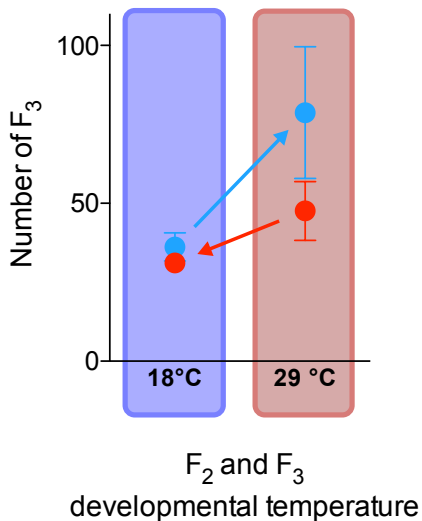

Figure 5

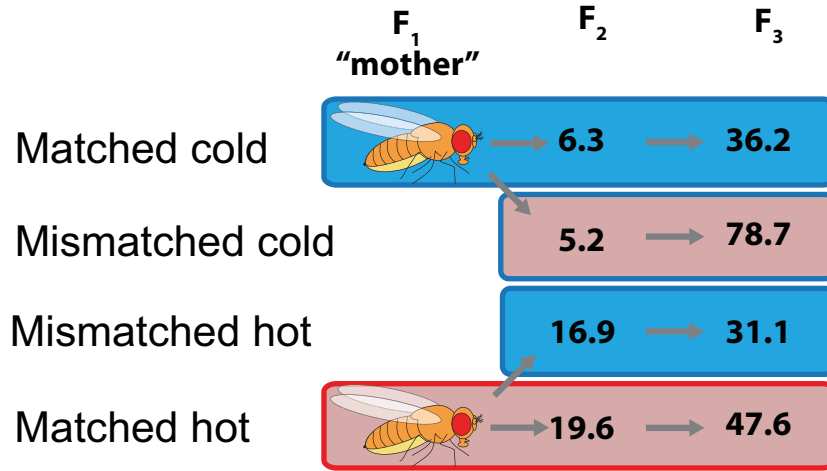

|                                   |       |       |
|-----------------------------------|-------|-------|
| Matched hot vs cold               | 3.1 X | 1.3 X |
| Mismatched hot vs mismatched cold | 3.3 X | 1.3 X |
| Matched cold vs mismatched cold   | 1.2 X | 0.5 X |
| Matched hot vs mismatched hot     | 1.2 X | 1.5 X |
| Matched cold vs Mismatched hot    | 0.3 X | 1.2 X |
| Matched hot vs Mismatched cold    | 3.8 X | 0.6 X |

Relative amount  
of offspring
